# Supplementary material for: BMP-Induced MicroRNA-101 Expression Regulates Vascular Smooth Muscle Cell Migration
Source: MDPI journal article supplement (doi:10.3390/ijms21134764), 2020-07-04
Supplement: s1 [file s1]

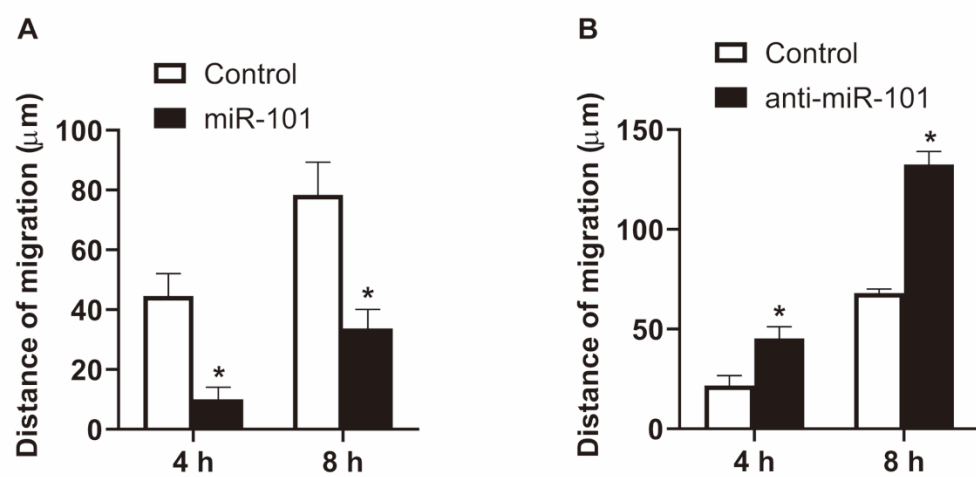

Supplementary Figure 1. miR-101 regulates VSMC migration.
